# Supplementary material for: Hydrothermal synthesis of Ba3Sc2F12:Yb3+, Ln3+ (Ln = Er, Ho, Tm) crystals and their up conversion white light emission
Source: Royal Society of Chemistry journal article supplement (doi:10.1039/c7ra11680b), 2017-01-01
Supplement: c7ra11680b1.pdf [file c7ra11680b1.pdf]

## Hydrothermal synthesis of $\text{Ba}_3\text{Sc}_2\text{F}_{12}:\text{Yb}^{3+}$ , $\text{Ln}^{3+}$ ( $\text{Ln} = \text{Er}$ , $\text{Ho}$ , $\text{Tm}$ ) crystals and their up conversion white light emission

Wei Wang<sup>1</sup>, Yunxi Li<sup>1</sup>, Shanshan Hu<sup>1,\*</sup>, Xuemei Zhang<sup>1</sup>, Jianfeng Tang<sup>2</sup> and Jun Yang<sup>1,\*</sup>

<sup>1</sup>School of Chemistry and Chemical Engineering, Southwest University, Chongqing, 400715, China.

<sup>2</sup>Faculty of Materials and Energy, Southwest University, Chongqing, 400715, China.

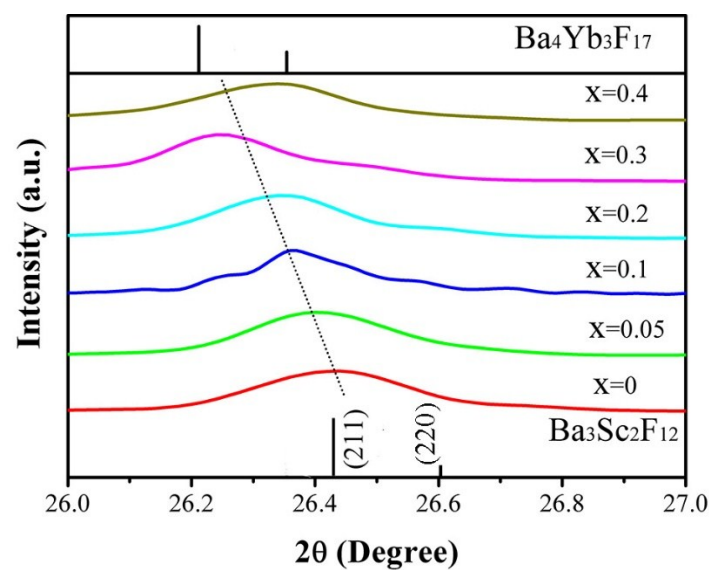

**Figure S1** XRD patterns of  $\text{Ba}_3\text{Sc}_{2(0.995-x)}\text{F}_{12}:\text{2xYb}^{3+}$ ,  $0.01\text{Er}^{3+}$  crystals ( $x = 0, 0.05, 0.1, 0.2, 0.3$  and  $0.4$ ) in the range of  $2\theta = 26^\circ - 27^\circ$ .

**Table S1** Refined cell parameters in  $\text{Ba}_3\text{Sc}_{2(0.995-x)}\text{F}_{12}: 2x\text{Yb}^{3+}, 0.01\text{Er}^{3+}$  crystals.

| Sample                                            | a(Å)    | c(Å)    | vol(Å <sup>3</sup> ) | syngony    | space group |
|---------------------------------------------------|---------|---------|----------------------|------------|-------------|
| $\text{Ba}_3\text{Sc}_2\text{F}_{12}$ (pdf card ) | 9.482   | 5.58700 | 502.32               | Tetragonal | P4/mbm(127) |
| X=0                                               | 9.46168 | 5.58396 | 499.89               | Tetragonal | P4/mbm(127) |
| X=0.05                                            | 9.46306 | 5.58295 | 499.95               | Tetragonal | P4/mbm(127) |
| X=0.1                                             | 9.45888 | 5.59758 | 500.82               | Tetragonal | P4/mbm(127) |
| X=0.2                                             | 9.47699 | 5.59915 | 502.88               | Tetragonal | P4/mbm(127) |
| X=0.3                                             | 9.50354 | 5.61470 | 507.10               | Tetragonal | P4/mbm(127) |
| X=0.4                                             | 9.48912 | 5.60457 | 504.65               | Tetragonal | P4/mbm(127) |

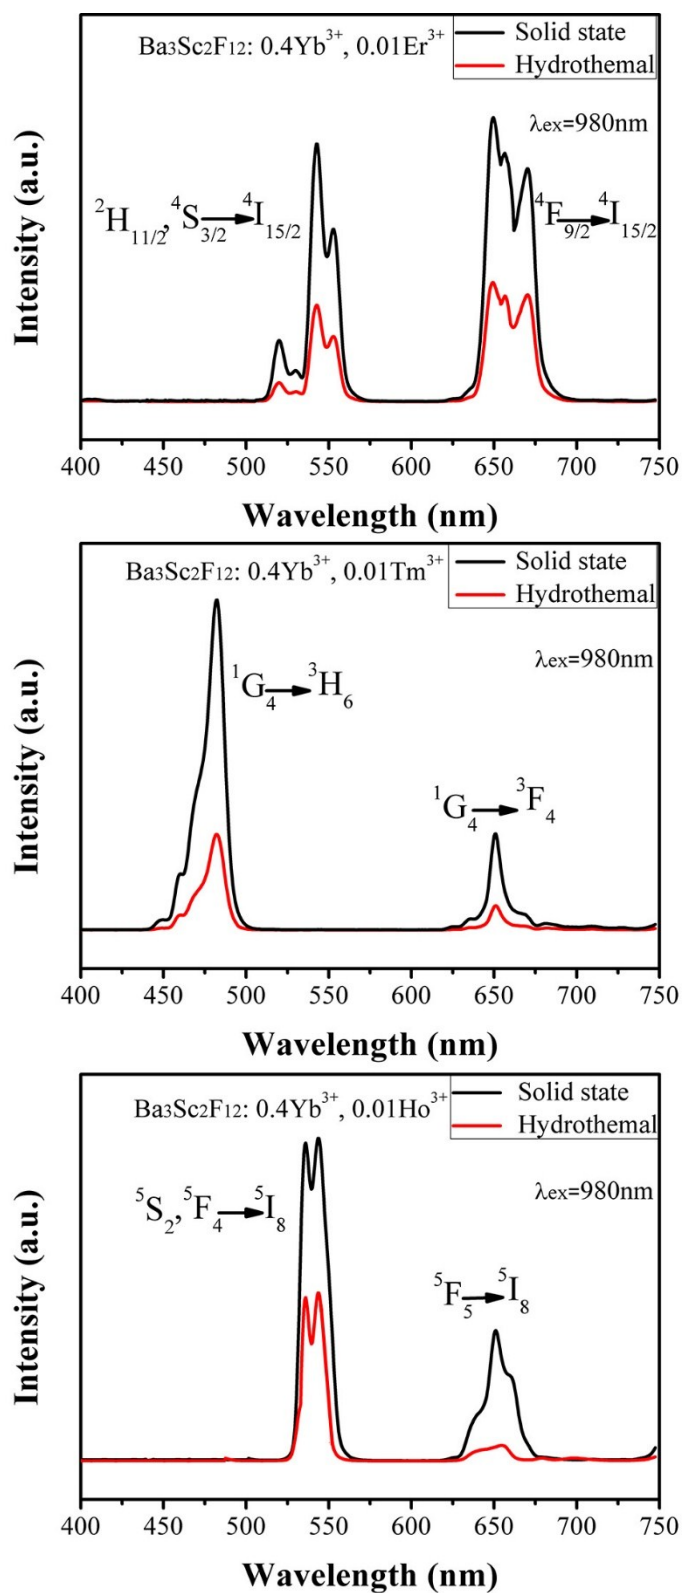

Fig. S2 The comparison of UC performance of  $\text{Ba}_2\text{Sc}_2\text{F}_{12}: 0.4\text{Yb}^{3+}/0.01\text{Ln}^{3+}$  ( $\text{Ln} = \text{Er}, \text{Tm}$  and  $\text{Ho}$ ) between hydrothermal and solid state route under 980 nm excitation with power density of  $3\text{W}/\text{cm}^2$ .
